# Supplementary material for: An efficient rule-based screening approach for discovering fast lithium ion conductors using density functional theory and artificial neural networks
Source: Royal Society of Chemistry journal article supplement (doi:10.1039/c3ta13235h), 2013-11-01
Supplement: c3ta13235h.pdf [file c3ta13235h.pdf]

## Electronic Supplementary Information (ESI)

### An Efficient Rule-Based Screening Approach for Discovering Fast Lithium Ion Conductors Using Density Functional Theory and Artificial Neural Networks

Randy Jalem,<sup>1</sup> Masanobu Nakayama,<sup>1,2,3</sup> Toshihiro Kasuga<sup>4</sup>

*1 Department of Materials Science and Engineering, Nagoya Institute of Technology, Gokiso, Showa, Nagoya, Aichi 466-8555, Japan*

*2 Japan Science and Technology Agency, Precursory Research for Embryonic Science and Technology (JST-PRESTO), Gokiso, Showa, Nagoya, Aichi 466-8555, Japan*

*3 Unit of Elements Strategy Initiative for Catalysts & Batteries (ESICB), Kyoto University, Katsura, Saikyo-ku, Kyoto 615-8520, Japan*

*4 Department of Frontier Materials, Nagoya Institute of Technology, Gokiso, Showa, Nagoya, Aichi 466-8555, Japan*

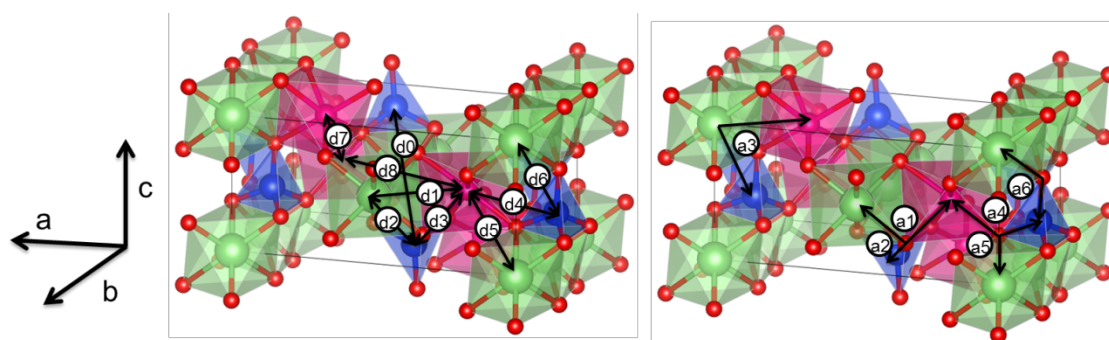

Figure S1. Illustration of the inter-polyhedron parameters within the unit cell that are used as input variables. The description and variable code assignment is shown in Table 1 of the main text.

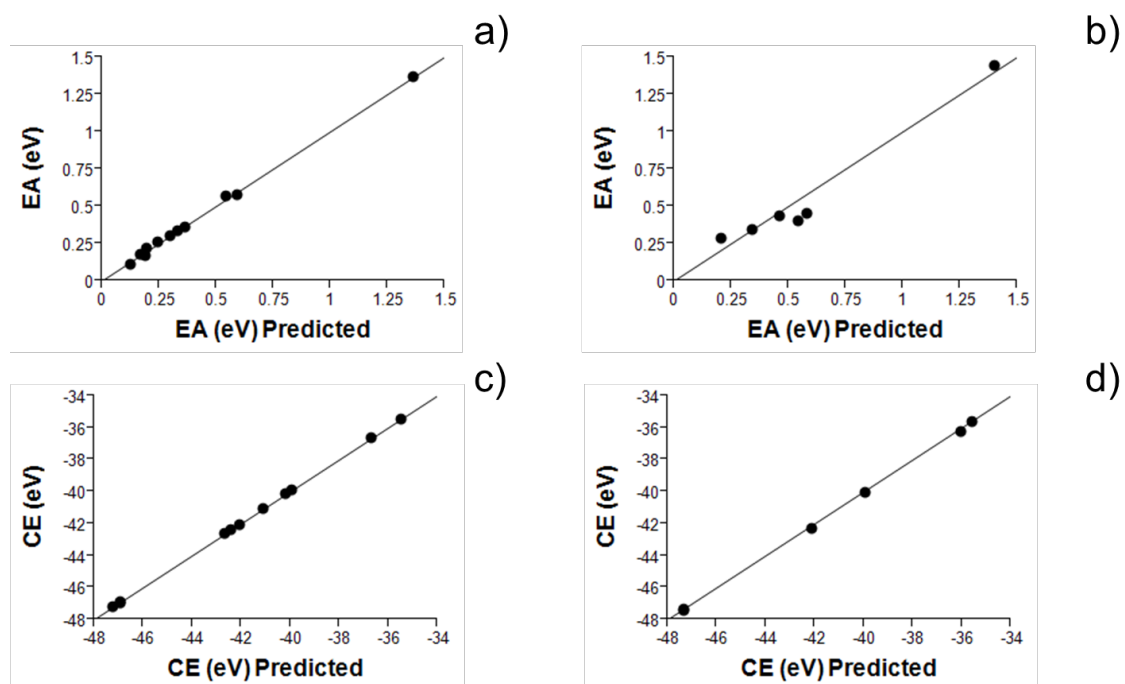

Figure S2. Fitting quality related to a)-c) training and b)-d) validation steps for the chosen final literature-driven NN model (LN3) with simultaneously fitted EA and CE values. The straight line represents the ideal fit.
